# Supplementary material for: A simple method for industrialization to enhance the tap density of LiNi0.5Co0.2Mn0.3O2cathode material for high-specific volumetric energy lithium-ion batteries
Source: Royal Society of Chemistry journal article supplement (doi:10.1039/c6ra11052e), 2016-01-01
Supplement: c6ra11052e1.pdf [file c6ra11052e1.pdf]

## Supporting Information

### **A Simple Method for Industrialization to Enhance Tap Density of $\text{LiNi}_{0.5}\text{Co}_{0.2}\text{Mn}_{0.3}\text{O}_2$ Cathode Material for High- Specific Volumetric Energy Lithium-ion Batteries**

Yin Zhang <sup>a</sup>, Zhen-Bo Wang <sup>a,\*</sup>, Min Nie <sup>b</sup>, Fu-Da Yu <sup>a</sup>, Yun-Fei Xia <sup>a</sup>, Bao-  
Sheng Liu <sup>a</sup>, Yuan Xue <sup>a</sup>, Li-Li Zheng <sup>a</sup>, Jin Wu <sup>c</sup>

<sup>a</sup> MIIT Key Laboratory of Critical Materials Technology for New Energy  
Conversion and Storage, School of Chemistry and Chemical Engineering, Harbin  
Institute of Technology, No.92 West-Da Zhi Street, Harbin, 150001 China

<sup>b</sup> College of chemical and chemical engineering, Harbin Normal University,  
Harbin Heilongjiang 150025, China

<sup>c</sup> Xi'an Huijie Industrial Co., Ltd., Xi'an, 710116 China

\* Corresponding author. Tel.: +86-451-86417853; Fax: +86-451-86418616.

*Email: [wangzjb@hit.edu.cn](mailto:wangzjb@hit.edu.cn) (Z.B. Wang)*

Table S1 Tap density of NCM523 with different weight ratios.

| Sample Number | Weight Ratio | Tap Density |
|---------------|--------------|-------------|
| 1             | 10:0:0       | 2.56        |
| 2             | 9:1:0        | 2.61        |
| 3             | 8:2:0        | 2.66        |
| 4             | 8:0:2        | 2.55        |
| 5             | 8:1:1        | 2.61        |
| 6             | 7:3:0        | 2.54        |
| 7             | 7:2:1        | 2.57        |
| 8             | 7:1:2        | 2.54        |
| 9             | 6:4:0        | 2.56        |
| 10            | 6:0:4        | 2.23        |
| 11            | 6:3:1        | 2.55        |
| 12            | 6:2:2        | 2.54        |
| 13            | 6:1:3        | 2.54        |
| 14            | 4:2:4        | 2.17        |
| 15            | 4:4:2        | 2.31        |
| 16            | 2:6:2        | 2.30        |
| 17            | 2:4:4        | 2.09        |
| 18            | 2:2:6        | 2.00        |
| 19            | 2:8:0        | 2.43        |
| 20            | 0:8:2        | 2.24        |
| 21            | 0:10:0       | 2.10        |
| 22            | 0:0:10       | 1.50        |
| 23            | 0:2:8        | 1.87        |

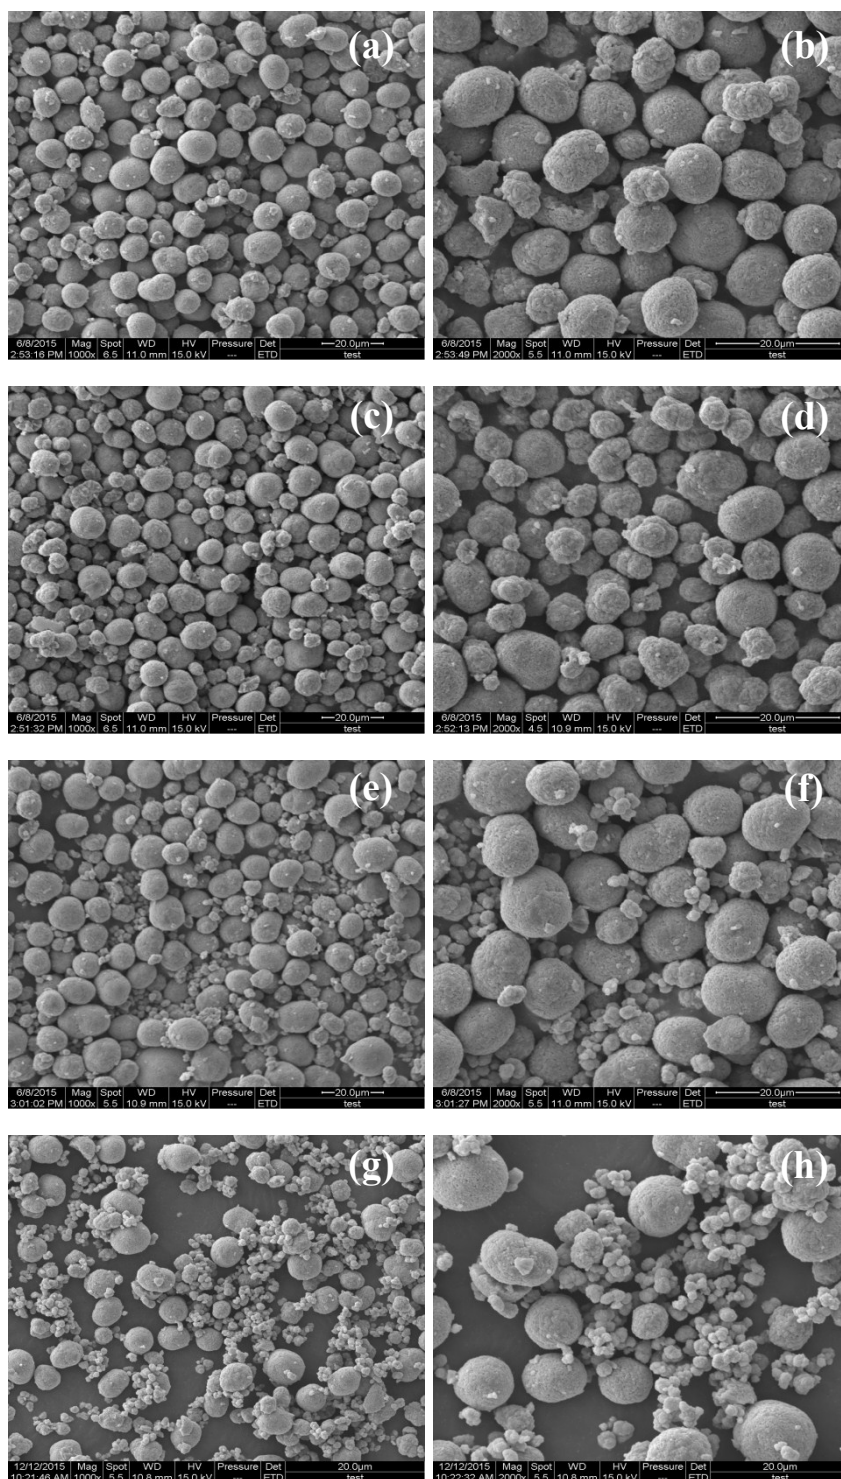

Fig. S1 SEM images and magnifications of mixed NCM523 materials: M2 (a, b), M3 (c, d), M5 (e, f) and M8 (g, h).

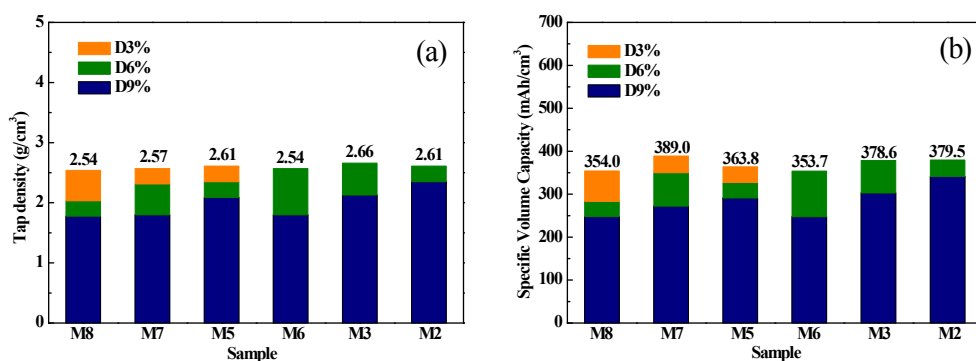

Fig. S2 Tap density and specific volume capacity of samples with different weight ratios, (a) is tap density of samples; (b) is specific volume capacity of samples.

Table S2 Particle size distribution of NCM523 samples with different weight ratios.

| Sample | D10    | D50    | D90     |
|--------|--------|--------|---------|
| M8     | 4.0920 | 8.7790 | 14.6100 |
| M7     | 4.7226 | 8.1743 | 12.2451 |
| M5     | 5.0728 | 9.2542 | 13.1708 |
| M6     | 5.7159 | 8.5951 | 12.5917 |
| M3     | 5.8500 | 8.7236 | 12.5041 |
| M2     | 6.6990 | 9.4760 | 12.8993 |

Table S3 Cycle performance of NCM523 samples for a voltage range of 3.0-4.3 V with 1 C rate.

| Sample | First 10 cycles average capacity (mAh/cm³) | First 10 cycles average capacity (mAh/cm³) | Capacity retention (%) |
|--------|--------------------------------------------|--------------------------------------------|------------------------|
| M7     | 394.3                                      | 379.4                                      | 96.2                   |
| M8     | 374.1                                      | 369.6                                      | 98.8                   |
| M5     | 360.5                                      | 357.7                                      | 99.2                   |
| M6     | 349.1                                      | 350.3                                      | 100.4                  |
| M3     | 382.1                                      | 374.5                                      | 98.0                   |
| M2     | 384.3                                      | 370.3                                      | 96.4                   |

Table S4 Cycle performance of NCM523 samples for a voltage range of 3.0-4.3 V with 1 C rate.

| Sample | First 10 cycles average capacity (mAh/cm <sup>3</sup> ) | Last 10 cycles average capacity (mAh/cm <sup>3</sup> ) | Capacity retention (%) |
|--------|---------------------------------------------------------|--------------------------------------------------------|------------------------|
| M7     | 394.3                                                   | 379.4                                                  | 96.2                   |
| M8     | 374.1                                                   | 369.6                                                  | 98.8                   |
| M5     | 360.5                                                   | 357.7                                                  | 99.2                   |
| M6     | 349.1                                                   | 350.3                                                  | 100.4                  |
| M3     | 382.1                                                   | 374.5                                                  | 98.0                   |
| M2     | 384.3                                                   | 370.3                                                  | 96.4                   |

Table S5 Cycle performance of NCM523 samples for a voltage range of 3.0-4.3 V with 1 C rate.

| Sample | First 10 cycles average capacity (mAh/cm <sup>3</sup> ) | First 10 cycles average capacity (mAh/cm <sup>3</sup> ) | Capacity retention (%) |
|--------|---------------------------------------------------------|---------------------------------------------------------|------------------------|
| D3     | 234.1                                                   | 232.4                                                   | 99.3                   |
| D6     | 306.9                                                   | 313.6                                                   | 102.2                  |
| D9     | 360.6                                                   | 369.1                                                   | 102.4                  |
| M7     | 394.3                                                   | 379.4                                                   | 96.2                   |

Table S6 Capacity of NCM523 samples with different rates charge-discharge from 3.0-4.3 V.

| Sample | 1 C (mAh/cm <sup>3</sup> ) | 2 C (mAh/cm <sup>3</sup> ) | 5 C (mAh/cm <sup>3</sup> ) | 5 C/1 C (%) | 1 C (mAh/cm <sup>3</sup> ) |
|--------|----------------------------|----------------------------|----------------------------|-------------|----------------------------|
| D3     | 230.4                      | 214.7                      | 189.7                      | 82.3        | 230.1                      |
| D6     | 314.5                      | 290.8                      | 255.0                      | 81.1        | 318.6                      |
| D9     | 371.5                      | 335.3                      | 291.0                      | 78.3        | 365.0                      |
| M7     | 371.5                      | 354.5                      | 327.2                      | 88.1        | 375.0                      |

Table S7 CV data of samples after 3 activation process with low current rate of 0.1 C.

| Samples | Eoxidation (V) | Eredution (V) | $\Delta E$ (V) |
|---------|----------------|---------------|----------------|
| D9      | 3.851          | 3.706         | 0.146          |
| M7      | 3.825          | 3.700         | 0.125          |
| M8      | 3.809          | 3.713         | 0.096          |
| M5      | 3.814          | 3.704         | 0.110          |
| M6      | 3.803          | 3.714         | 0.089          |
| M3      | 3.811          | 3.706         | 0.105          |
| M2      | 3.822          | 3.696         | 0.126          |
